# Supplementary material for: Proline Dehydrogenase/Proline Oxidase (PRODH/POX) Is Involved in the Mechanism of Metformin-Induced Apoptosis in C32 Melanoma Cell Line
Source: MDPI journal article supplement (doi:10.3390/ijms23042354), 2022-02-21
Supplement: s1 [file s1]

## **PRODH/POX is involved in the mechanism of metformin-induced apoptosis in melanoma cells.**

**Ilona Oscilowska<sup>1</sup>, Karol Rolkowski<sup>2</sup>, Weronika Baszanowska<sup>2</sup>, Thi Yen Ly Huynh<sup>2</sup>, Sylwia Lewoniewska<sup>2</sup>, Magdalena Nizioł<sup>1</sup>, Magdalena Sawicka<sup>1</sup>, Katarzyna Bielawska<sup>1</sup>, Paweł Szoka<sup>1</sup>, Wojciech Miltyk<sup>1</sup> and Jerzy Palka<sup>2,\*</sup>**

<sup>1</sup> Department of Analysis and Bioanalysis of Medicines, Medical University of Białystok, Kilinskiego 1, 15-089 Białystok, Poland, phone: +48-85-748-5845; e-mail: ilona.zareba@gmail.com (I.O.), katarzyna.bielawska@umb.edu.pl (K.B.), pawelszoka@wp.pl (P.S.), magdalena.niziol@umb.edu.pl (M.N.), sawicka.magdalenamaria@gmail.com (M.S.), wojciech.miltyk@umb.edu.pl (W.M.)

<sup>2</sup> Department of Medicinal Chemistry, Medical University of Białystok, Kilinskiego 1, 15-089 Białystok, Poland, phone: +48-85-748-5706; e-mail: karol.rolkowski@gmail.com (R.K.), w.baszanowska22@wp.pl (W.B.), htyly79@gmail.com (T.Y.L.H.), sylwialewoniewska123@wp.pl (S.L.), pal@umb.edu.pl (J.P.)

\* Correspondence: pal@umb.edu.pl; Tel.: +48-85-748-5706

---

## 1. Results

### 1.1. AMPK expression

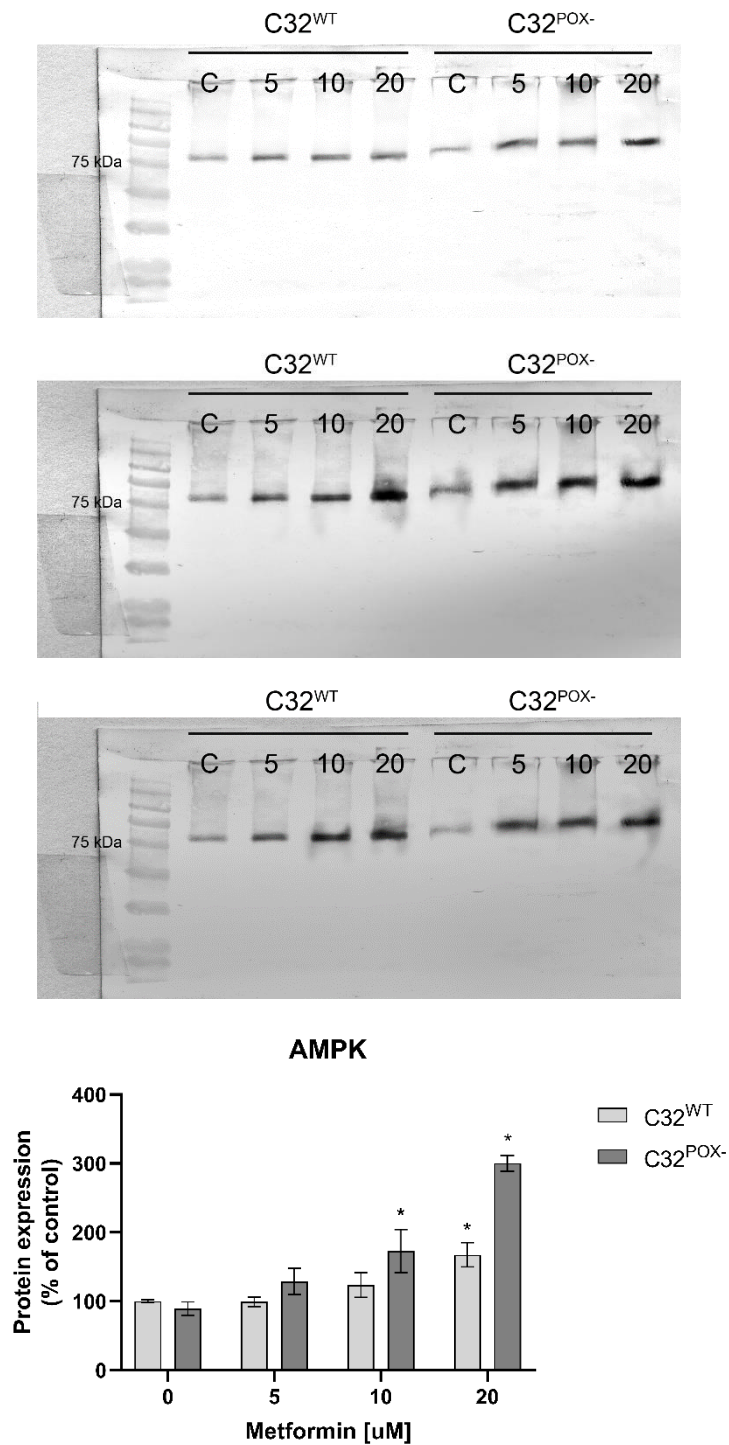

**Figure S1** The AMPK expressions in C32<sup>WT</sup> and C32<sup>POX-</sup> cells cultured in DMEM. GAPDH expression was used as a loading control. The WB bands intensity of representative gels was quantified by densitometry and normalized to GAPDH. The densitometry values represent the mean (% of control)  $\pm$  SD of three experiments, \*P < 0.001.

## 1.2. PRODH/POX expression

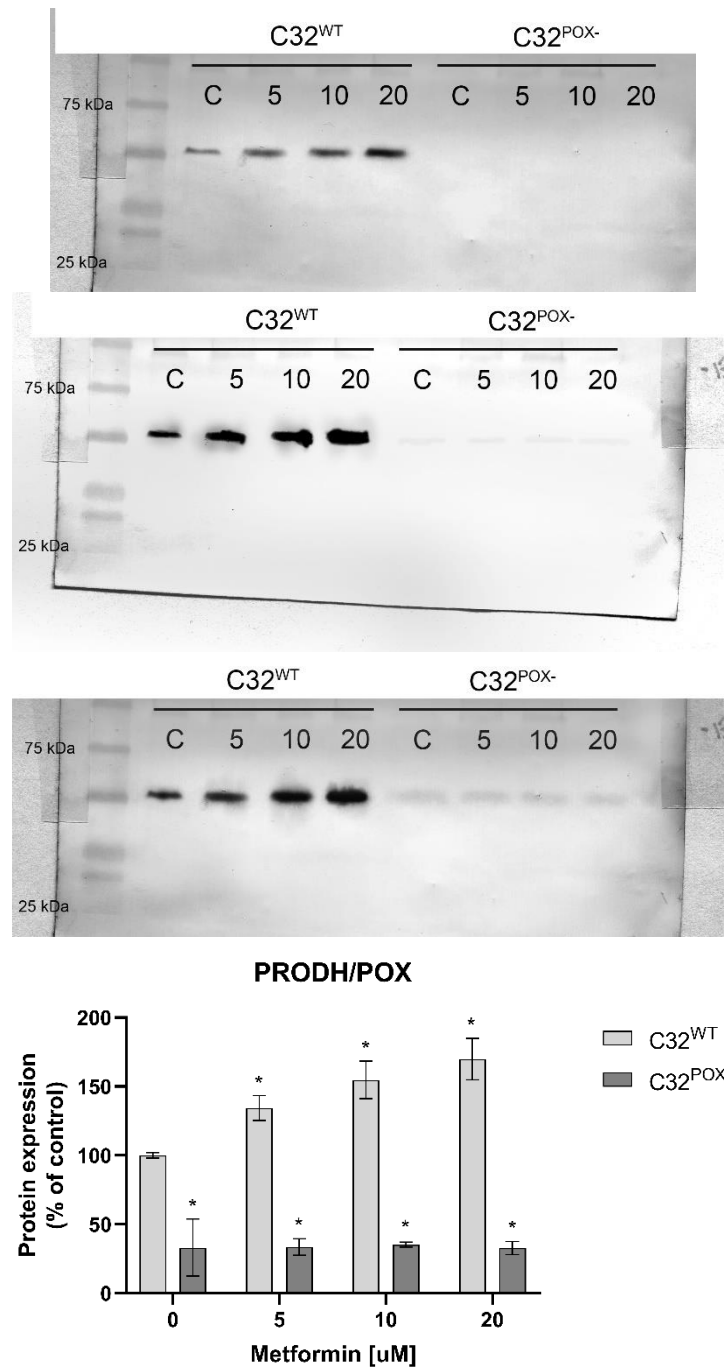

**Figure S2** The PRODH/POX expressions in C32<sup>WT</sup> and C32<sup>POX-</sup> cells cultured in DMEM. GAPDH expression was used as a loading control. The WB bands intensity of representative gels was quantified by densitometry and normalized to GAPDH. The densitometry values represent the mean (% of control)  $\pm$  SD of three experiments, \* $P < 0.001$ .

### 1.3. Expression of Caspase-9 and cleaved-Caspase-9

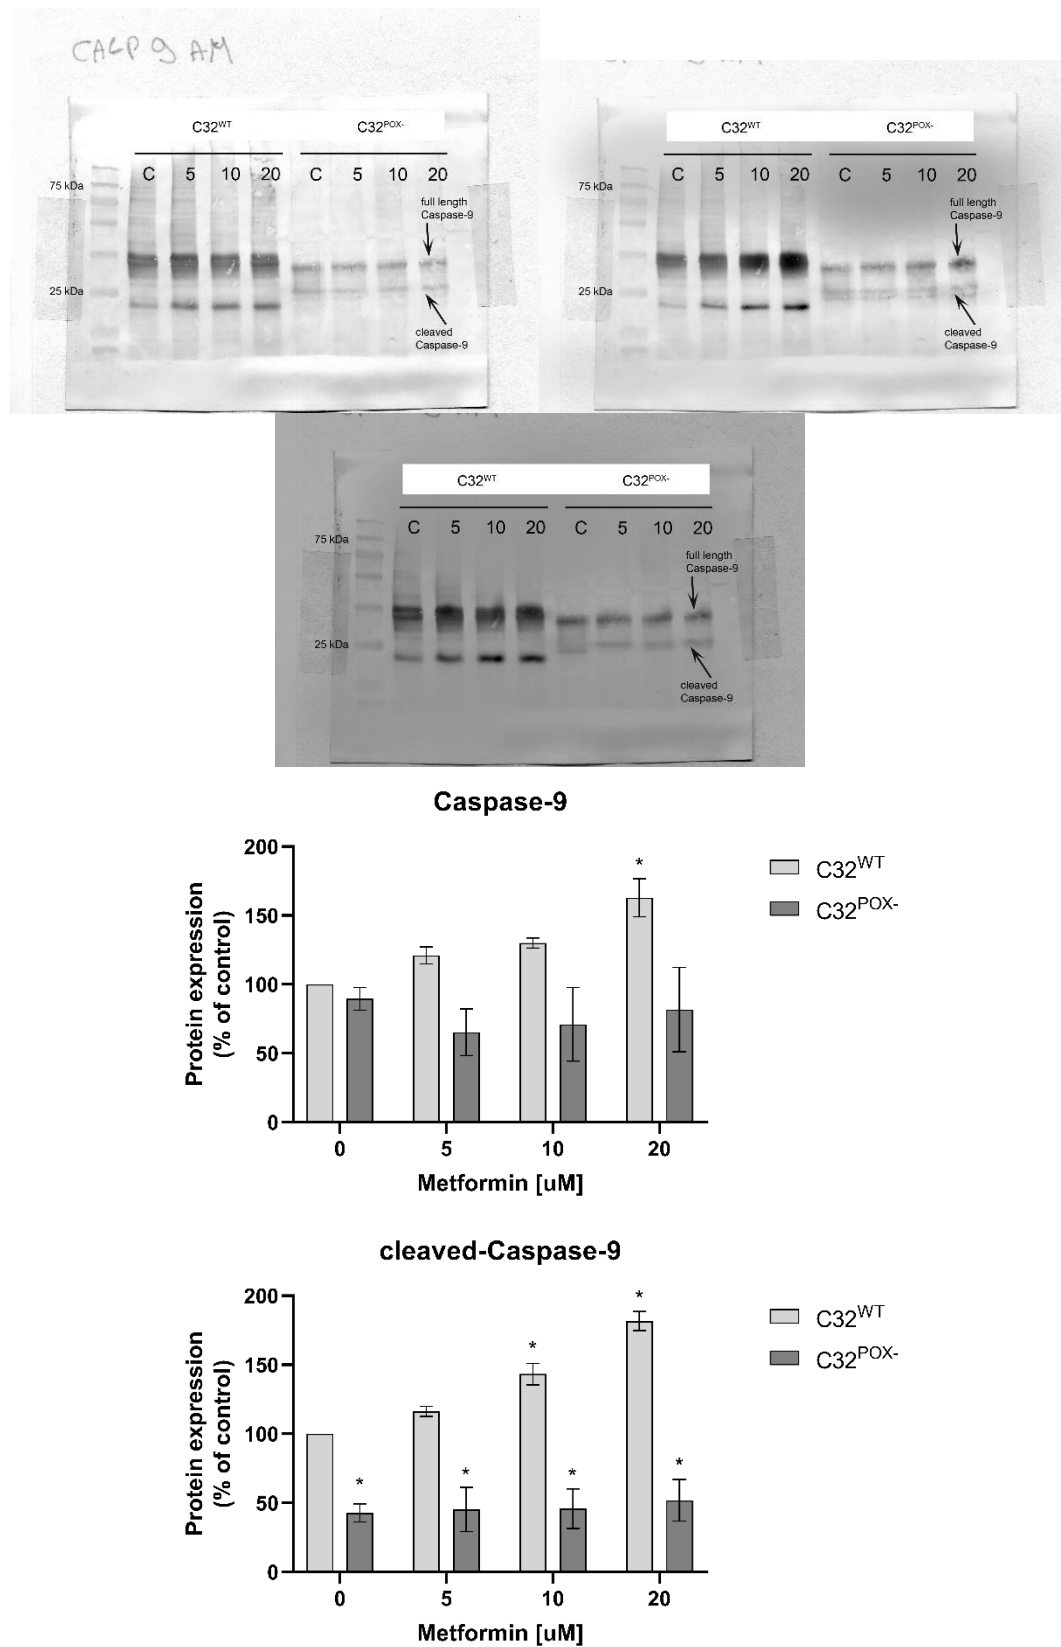

**Figure S3** The expression of Caspase-9 and cleaved-Caspase-9 in C32<sup>WT</sup> and C32<sup>POX-</sup> cells cultured in DMEM. GAPDH expression was used as a loading control. The WB bands intensity of representative gels was quantified by densitometry and normalized to GAPDH. The densitometry values represent the mean (% of control)  $\pm$  SD of three experiments, \*P < 0.001.

#### 1.4. Caspase-3 expression

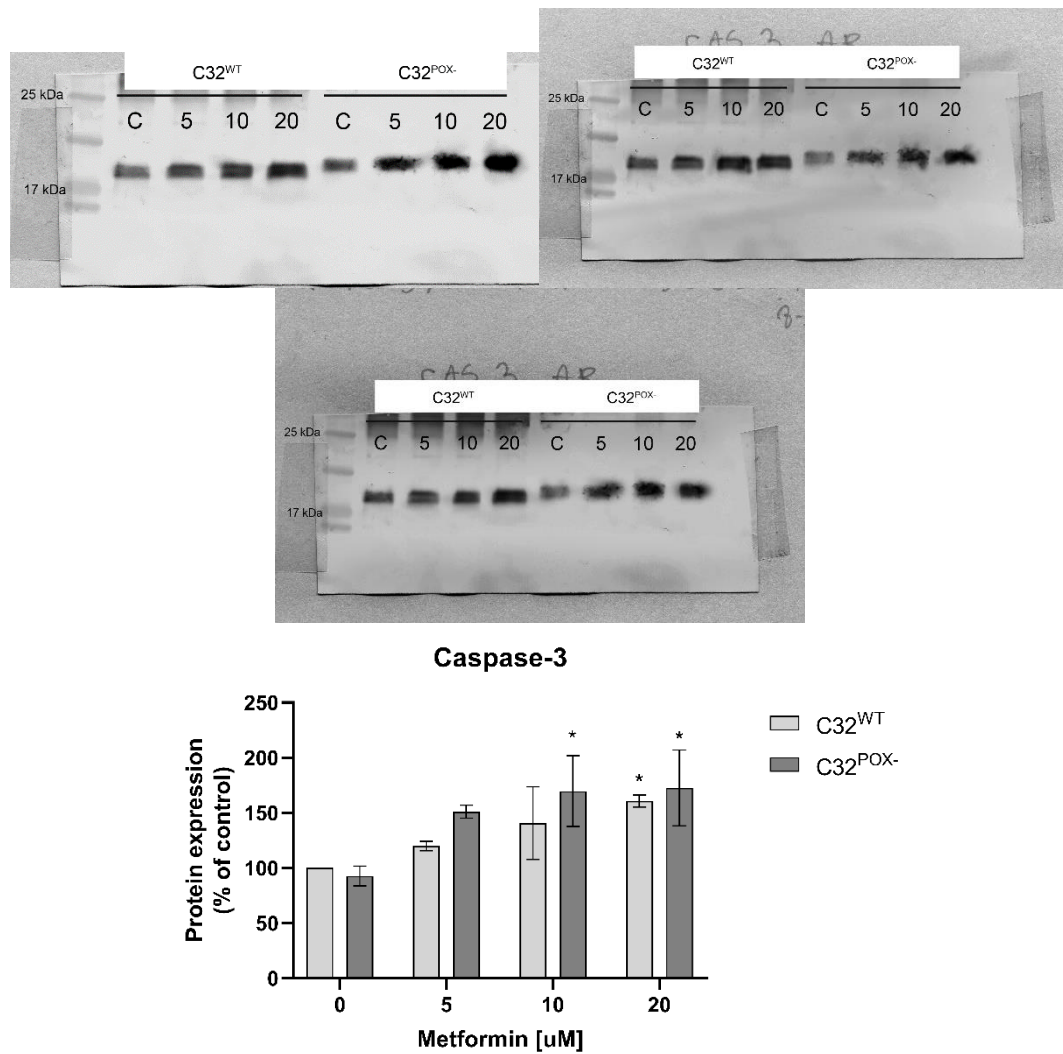

**Figure S4** The Caspase-3 expressions in C32<sup>WT</sup> and C32<sup>POX-</sup> cells cultured in DMEM. GAPDH expression was used as a loading control. The WB bands intensity of representative gels was quantified by densitometry and normalized to GAPDH. The densitometry values represent the mean (% of control) ± SD of three experiments, \*P < 0.001.

### 1.5. Cleaved-Caspase-3 expression

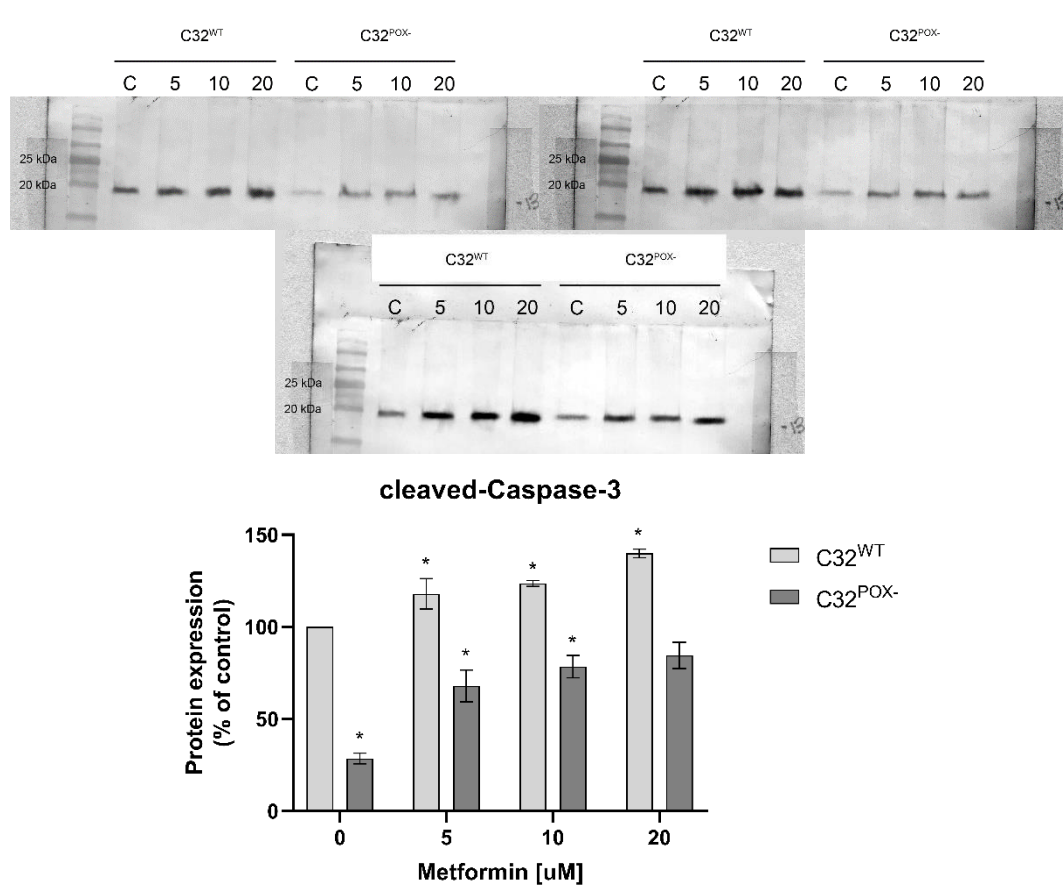

**Figure S5** The cleaved-Caspase-3 expressions in C32<sup>WT</sup> and C32<sup>POX-</sup> cells cultured in DMEM. GAPDH expression was used as a loading control. The WB bands intensity of representative gels was quantified by densitometry and normalized to GAPDH. The densitometry values represent the mean (% of control)  $\pm$  SD of three experiments, \* $P < 0.001$ .

### 1.6. Expression of PARP and cleaved-PARP

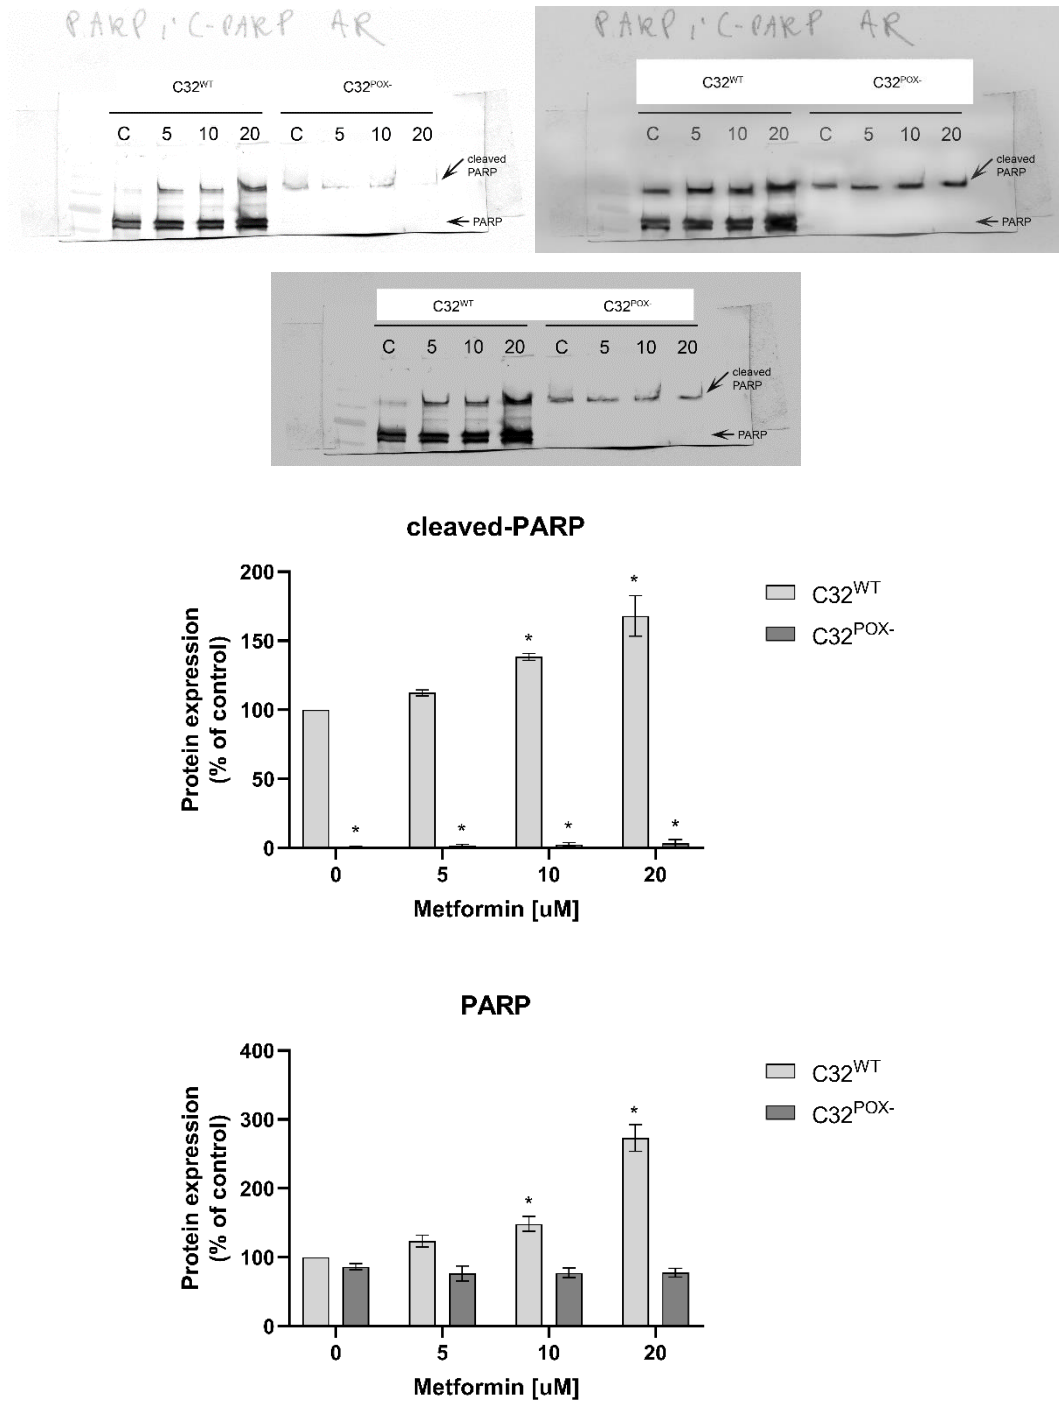

**Figure S6** The expressions of PARP and cleaved-PARP in C32<sup>WT</sup> and C32<sup>POX-</sup> cells cultured in DMEM. GAPDH expression was used as a loading control. The WB bands intensity of representative gels was quantified by densitometry and normalized to GAPDH. The densitometry values represent the mean (% of control)  $\pm$  SD of three experiments, \*P < 0.001.

### 1.7. Beclin-1 expression

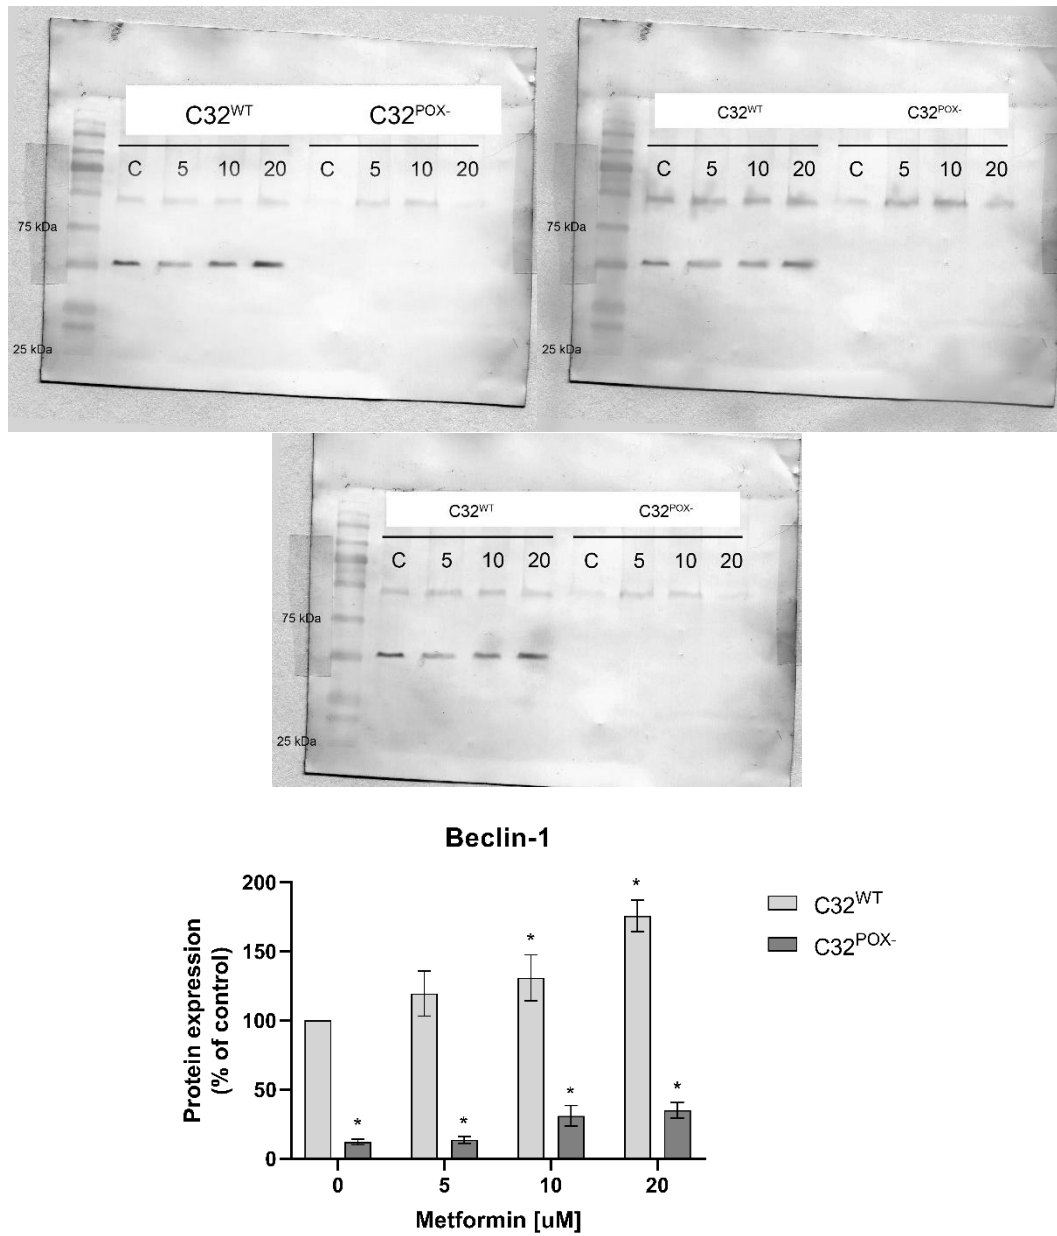

**Figure S7** The Beclin-1 expressions in C32<sup>WT</sup> and C32<sup>POX-</sup> cells cultured in DMEM. GAPDH expression was used as a loading control. The WB bands intensity of representative gels was quantified by densitometry and normalized to GAPDH. The densitometry values represent the mean (% of control)  $\pm$  SD of three experiments, \*P < 0.001.



### 1.8. Atg7 expression

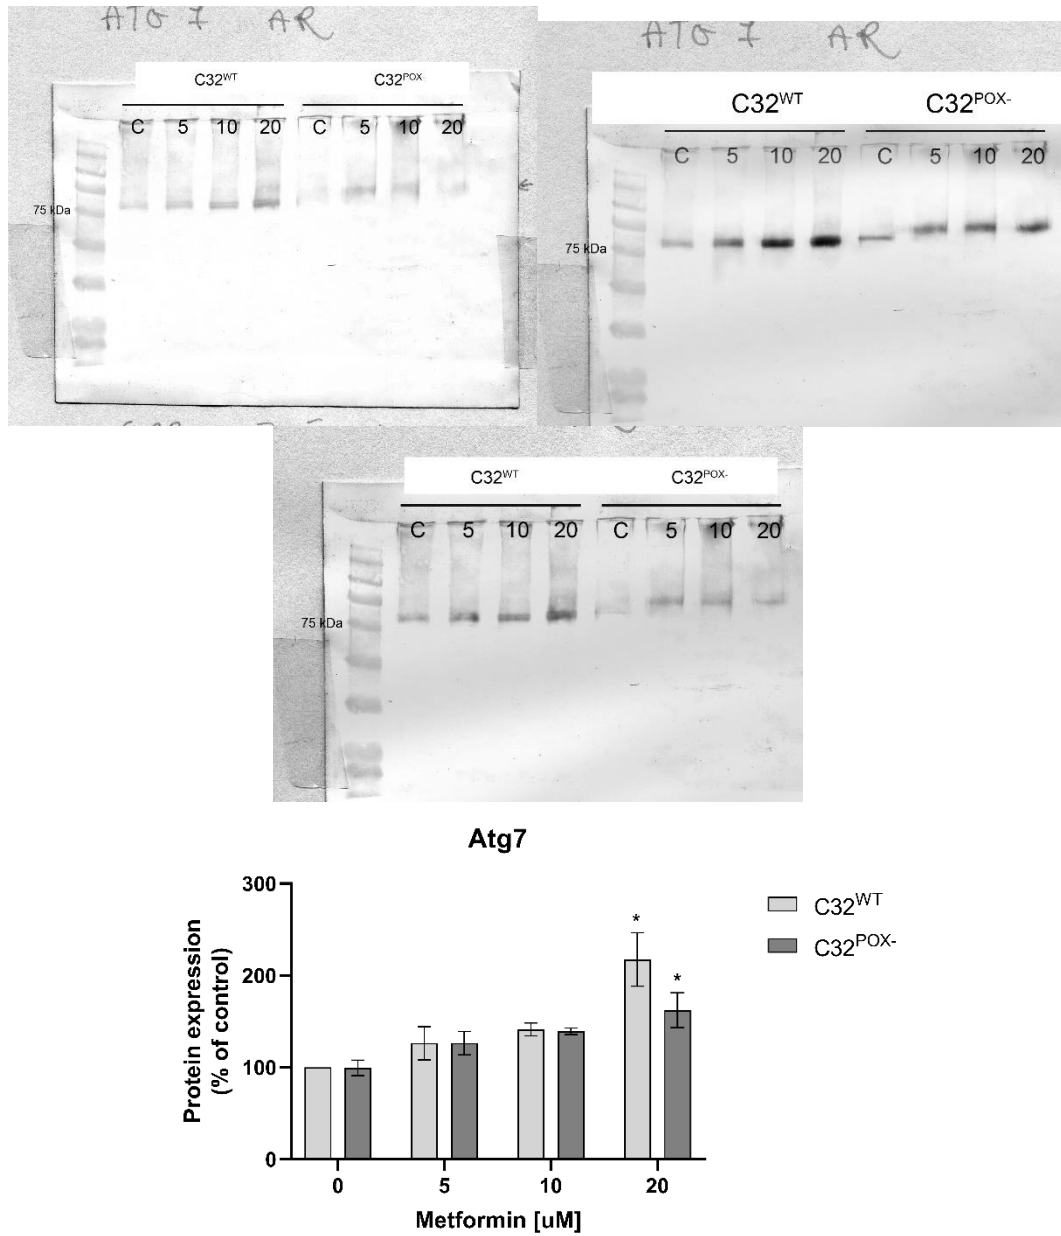

**Figure S8** The Atg7 expressions in C32<sup>WT</sup> and C32<sup>POX-</sup> cells cultured in DMEM. GAPDH expression was used as a loading control. The WB bands intensity of representative gels was quantified by densitometry and normalized to GAPDH. The densitometry values represent the mean (% of control)  $\pm$  SD of three experiments, \*P < 0.001.
